# Supplementary material
Source: MDPI journal article supplement (https://www.mdpi.com/2073-4433/11/11/1150)
Supplement: s1 [file s1]

# Regional Inhaled Deposited Dose of Indoor Combustion-Generated Aerosols in Jordanian Urban Homes

Tareq Hussein <sup>1,2,3,\*</sup>, Brandon E. Boor <sup>4,5</sup> and Jakob Löndahl <sup>6</sup>

<sup>1</sup> Department of Physics, The University of Jordan, Amman 11942, Jordan

<sup>2</sup> Institute for Atmospheric and Earth System Research (INAR/Physics), University of Helsinki, FI-00014 Helsinki, Finland

<sup>3</sup> Department Material Analysis and Indoor Chemistry, Fraunhofer WKI, D-38108 Braunschweig, Germany

<sup>4</sup> Lyles School of Civil Engineering, Purdue University, West Lafayette, IN 47907, USA; bboor@purdue.edu

<sup>5</sup> Ray W. Herrick Laboratories, Center for High Performance Buildings, Purdue University, West Lafayette, IN 47907, USA

<sup>6</sup> Department of Design Sciences, Lund University, P.O. Box 118, SE-221 00 Lund, Sweden; jakob.londahl@design.lth.se

\* Correspondence: tareq.hussein@helsinki.fi

## S1. Inhaled Deposited Dose Rate

According to the ICRP and MPPD models, the respiratory tract is divided into three main regions: head/throat, tracheobronchial (TB), and pulmonary/alveolar (P/Alv). Following our previous methods as described by Hussein, et al. [7], we can calculate the regional inhaled deposited dose for a specific particle diameter range ( $D_{p1}$ – $D_{p2}$ ) during a one-hour exposure period as a dose rate:

$$\text{Dose Rate} = \int_{D_{p1}}^{D_{p2}} V_E \times DF(D_p) \times n_N^0(D_p) \times f \cdot d\log(D_p) \quad (\text{S1})$$

where  $V_E$  [m<sup>3</sup>/h] is the minute ventilation (volume of air breathed, Table S1),  $DF(D_p)$  is the particle deposition fraction in a particular region of the respiratory tract (Figure S1),  $n_N^0(D_p)$  [particles/cm<sup>3</sup>] is the particle number size distribution (i.e.,  $dN/d\log(D_p)$ ), and  $f$  is a metric conversion for the particle concentration (i.e., it is 1 for particle number and for particle mass =  $\rho_p D_p^3 \pi / 6$ , where  $\rho_p$  is the particle effective density). The deposition fraction ( $DF$ ) and the particle number size distribution ( $n$ ) are functions of particle diameter ( $D_p$ ).

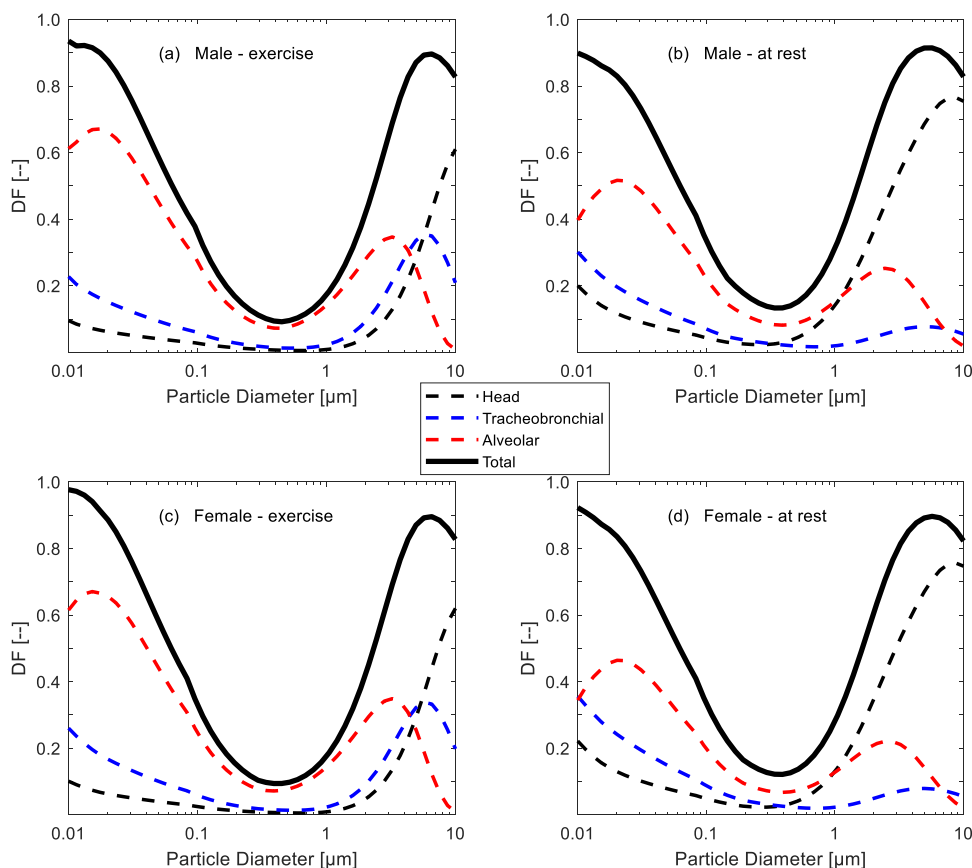

**Figure S1.** Size-resolved deposition fraction ( $DF$ ) curves for the respiratory tract of adult subjects: (a) male exercising, (b) male at rest, (c) female exercising, and (d) female at rest. Data was adopted from Löndahl et al. [22] and the ICRP and MPPD models.

The dose rates were calculated for adult male and female subjects reflecting different types of activities (resting, exercising, and conducting house work; Table S1 and Figure S1) and exposure scenarios to different combustion processes (heating, cooking, and smoking). The combination between subjects, activities, and combustion processes reflects common exposure scenarios in Jordanian dwellings during the winter season.

**Table S1.** Minute ventilation (volume of air breathed),  $V_E$  [ $\text{m}^3/\text{h}$ ], for adult subjects according to Holmes [21]. The last column indicates the deposition fraction curve used for the listed activity (Figure S1).

| Activity           | Female | Male | $DF$ Curve Type |
|--------------------|--------|------|-----------------|
| Yardwork           | 1.08   | 1.74 | Exercise        |
| Walking (4.0 km/h) | 1.20   | 1.38 | Exercise        |
| Standing           | 0.48   | 0.66 | at rest         |
| Sitting            | 0.42   | 0.54 | at rest         |

## S2. Indoor Particle Number Size Distributions

The particle number size distributions were adopted from a previous measurement campaign reported by Hussein et al. [23] for eight homes from 23 December 2018 to 12 January 2019 (i.e. winter season) in Amman, Jordan (Figure S2, Table S2). The experimental setup consisted of two portable condensation particle counters (CPC 3007 and P-Trak 8525, TSI Inc., Minnesota, USA) and a handheld optical particle counter (AeroTrak 9306-V2, TSI Inc., Minnesota, USA); see also Table S3.

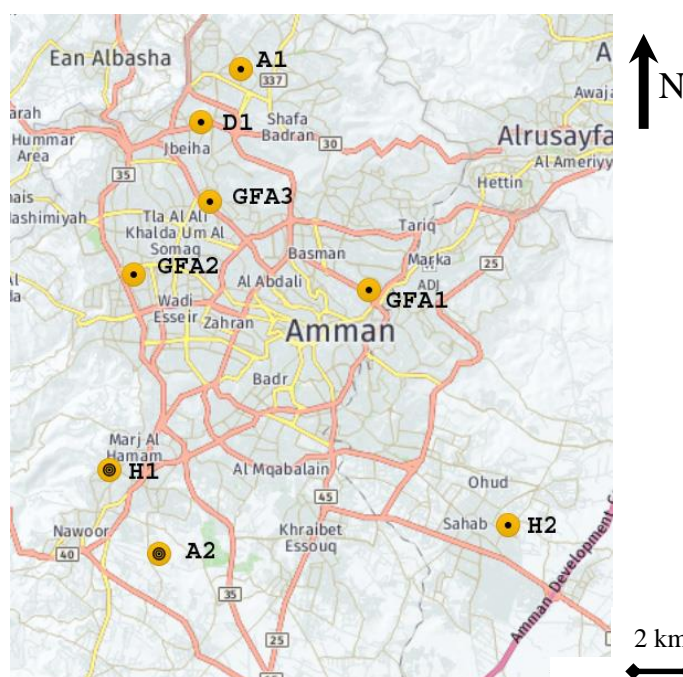

**Figure S2.** A map showing the Amman metropolitan region with the locations of the selected indoor environment study sites. The type of dwelling is referred to as: (A) Apartment, (H) house, (D) duplex apartment, and (GFA) ground floor apartment. Table S2 provides additional details for each dwelling.

**Table S2.** Summary of the indoor environments and the measurement campaign period.

| Site ID | Heating Method |             |           |          |         | Smoking |        | Measurement Period |                   |
|---------|----------------|-------------|-----------|----------|---------|---------|--------|--------------------|-------------------|
|         | Kerosene       | Natural Gas | Air Cond. | Electric | Central | Tobacco | Shisha | Start              | End               |
| A1      | √              | √           | √         |          |         |         |        | 13:15, 23.12.2018  | 11:50, 25.12.2018 |
| A2      |                |             | √         |          |         |         |        | 18:20, 04.01.2019  | 19:50, 05.01.2019 |
| D1      | √              |             | √         |          |         |         | √      | 14:10, 28.12.2018  | 22:10, 30.12.2018 |
| GFA1    | √              | √           |           |          |         |         |        | 15:10, 25.12.2018  | 14:10, 27.12.2018 |
| GFA2    |                |             |           | √        | √       |         |        | 12:00, 09.01.2019  | 20:40, 12.01.2019 |
| GFA3    |                | √           |           |          |         | √       | √      | 12:30, 31.12.2018  | 18:30, 02.01.2019 |
| H1      |                | √           |           |          | √       |         | √      | 20:20, 02.01.2019  | 16:30, 04.01.2019 |
| H2      | √              |             |           |          |         |         |        | 12:30, 06.01.2019  | 15:30, 09.01.2019 |

**Table S3.** List of the portable air quality instruments and the measured parameters.

| Instrument                    | Model                | Aerosol Size Fraction               | Metric | Performance Ref.   |
|-------------------------------|----------------------|-------------------------------------|--------|--------------------|
| Optical Particle Counter      | TSI AeroTrak 9306-V2 | $D_p$ 0.3–25 $\mu\text{m}$ (6 bins) | Number | Wang et al. [24]   |
| Condensation Particle Counter | TSI CPC 3007         | $D_p$ 0.01–2 $\mu\text{m}$          | Number | Matson et al. [26] |
| Condensation Particle Counter | TSI P-Trak 8525      | $D_p$ 0.02–2 $\mu\text{m}$          | Number | Matson et al. [26] |

### S3. Derivation of Particle Size Distributions

The measured concentrations by each instrument were interpolated into a coherent time grid. The use of this combination of portable instruments provides a basis to derive the particle number size distribution (10 nm–25  $\mu\text{m}$ ) with 8 channels (0.01, 0.025, 0.3, 0.5, 1, 2.5, 5, 10, and 25  $\mu\text{m}$ ) [23–32]. The particle mass size distribution was calculated by assuming spherical particles as:

$$n_M^0 = \frac{dM}{d\log(D_p)} = \frac{dN}{d\log(D_p)} \frac{\pi}{6} D_p^3 \rho_p = n_N^0 \frac{\pi}{6} D_p^3 \rho_p \quad (\text{S2})$$

where  $n_M^0$  is the particle mass size distribution,  $dM$  is the particle mass concentration within a certain diameter bin normalized to the width of the diameter range ( $d\log(D_p)$ ) of that diameter bin,  $dN$  is the particle number concentration within that diameter bin (also normalized with respect to  $d\log(D_p)$ ) to obtain the particle number size distribution,  $n_N^0$ ,  $D_p$  is the particle diameter, and  $\rho_p$  is the particle effective density (Table S4), here assumed to be similar to what was reported for urban air in Asian cities (Wu and Boor [33]).

**Table S4.** Urban aerosol effective densities for Asian cities according to a review by Wu and Boor [53].

| Range of $D_p$ [ $\mu\text{m}$ ]              | 0.01–0.025 | 0.025–0.3 | 0.3–0.5 | 0.5–1 | 1–2.5 | 2.5–5 | 5–10 |
|-----------------------------------------------|------------|-----------|---------|-------|-------|-------|------|
| Effective $\rho_p$ [ $\text{kg}/\text{m}^3$ ] | 1400       | 1400      | 1650    | 1750  | 1650  | 1500  | 1500 |

In practice, the particle density is size-dependent and variable for different aerosol populations (i.e., diesel soot vs. organic aerosol); therefore, size-resolved effective density functions should be used. However, there is limited empirical data on the effective densities of aerosols produced by indoor emission sources. Thus, the assumption for the particle effective density will result in uncertainties (over- or under-estimates, depending on the source) in the estimated mass concentrations. As this study is investigating exposure to aerosols originating from fossil fuel combustion (natural gas heaters and stoves, kerosene heaters), we foresee the assumption used here for the effective density as valid for the emission periods.

#### S4. Mean Particle Number Size Distributions Categorized per Home

Figure S3 presents the mean particle number size distributions during selected indoor activities categorized per home, where they were reported, and compared to the corresponding background particle number size distribution.

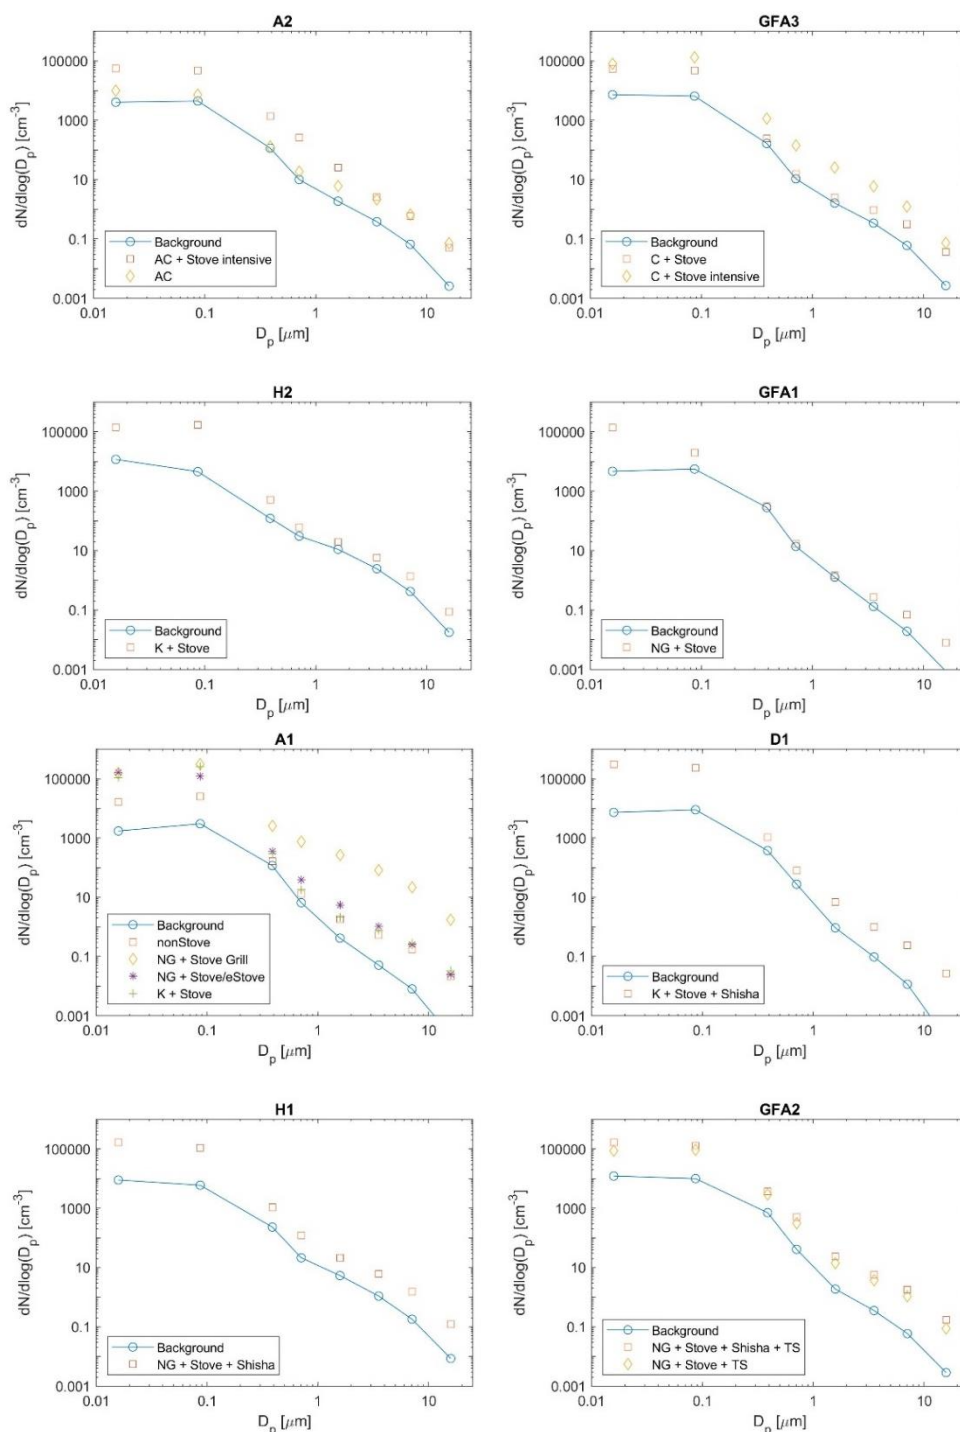

**Figure S3.** Mean particle number size distributions during selected indoor activities categorized per home, where they were reported, and compared to the corresponding background particle number size distribution. Heating type: natural gas heater (NG), kerosene heater (K), central heating system (C), and air conditioning split unit (AC). Smoking type: shisha (SH) and tobacco smoking (TS). Cooking was reported on either a stove (natural gas) or using non-combustion appliances (e.g. water jug heater, microwave, etc.); the cooking intensity was indicated too.

### S5. Calculation of the Size-Fractionated Particle Number and Mass Concentrations

The size-fractionated particle number concentration was calculated as:

$$PN_{D_{p2}-D_{p1}} = \int_{D_{p1}}^{D_{p2}} n_N^0(D_p) \cdot d\log(D_p) \quad (S3)$$

where  $PN_{D_{p2}-D_{p1}}$  is the calculated size-fractionated particle number concentration within the particle diameter range  $D_{p1}-D_{p2}$ . Similarly, the size-fractionated particle mass concentration ( $PM_{D_{p2}-D_{p1}}$ ) was calculated as:

$$PM_{D_{p2}-D_{p1}} = \int_{D_{p1}}^{D_{p2}} n_M^0(D_p) \cdot d\log(D_p) = \int_{D_{p1}}^{D_{p2}} n_N^0(D_p) \frac{\pi}{6} D_p^3 \rho_p \cdot d\log(D_p) \quad (S4)$$

PM<sub>2.5</sub> and PM<sub>10</sub> can be also calculated by using Equation (3) and integrating over the particle diameter range starting from 10 nm (i.e., the lower cutoff diameter according to our instrument setup) and up to 2.5 µm (for PM<sub>2.5</sub>) or 10 µm (for PM<sub>10</sub>). Table S5 lists the mean particle concentrations during each selected activity reported in the homes.

**Table S5.** Classification of indoor activities and corresponding particle concentrations.

| Heating <sup>1</sup> | Smoking <sup>2</sup> | Cooking <sup>3</sup>     |      | $\Delta t$<br>[min] | PM <sub>2.5</sub><br>[ $\mu\text{g}/\text{m}^3$ ] | PM <sub>10</sub><br>[ $\mu\text{g}/\text{m}^3$ ] | PN <sub>1</sub><br>[ $\times 10^3 \text{ cm}^{-3}$ ] |
|----------------------|----------------------|--------------------------|------|---------------------|---------------------------------------------------|--------------------------------------------------|------------------------------------------------------|
| √ (NG)               |                      | --                       | A1   | 26                  | 54 ± 26                                           | 64 ± 27                                          | 214 ± 71                                             |
| √ (NG)               |                      | Stove                    | A1   | 59                  | 70 ± 15                                           | 81 ± 17                                          | 274 ± 38                                             |
| √ (NG)               |                      | Stove / Grilling         | A1   | 27                  | 378 ± 101                                         | 2094 ± 882                                       | 383 ± 82                                             |
| √ (NG)               |                      | Stove                    | GFA1 | 52                  | 9 ± 2                                             | 19 ± 3                                           | 85 ± 13                                              |
| √ (NG)               |                      | Stove                    | GFA1 | 78                  | 13 ± 7                                            | 16 ± 7                                           | 68 ± 11                                              |
| √ (NG)               | TS                   | Stove                    | GFA3 | 46                  | 40 ± 8                                            | 189 ± 57                                         | 91 ± 18                                              |
| √ (NG)               | TS                   | Stove                    | GFA3 | 145                 | 98 ± 26                                           | 158 ± 51                                         | 151 ± 37                                             |
| √ (NG)               | SH                   | Stove                    | H1   | 39                  | 173 ± 41                                          | 424 ± 152                                        | 245 ± 53                                             |
| √ (NG)               |                      | Stove                    | GFA1 | 270                 | 65 ± 17                                           | 374 ± 91                                         | 169 ± 52                                             |
| √ (K)                |                      | Stove                    | H2   | 525                 | 130 ± 15                                          | 458 ± 110                                        | 318 ± 53                                             |
| √ (K)                |                      | Stove                    | H2   | 1064                | 82 ± 24                                           | 154 ± 60                                         | 220 ± 78                                             |
| √ (K)                |                      | Stove                    | H2   | 979                 | 78 ± 17                                           | 141 ± 36                                         | 236 ± 52                                             |
| √ (K)                |                      | Stove                    | H2   | 324                 | 43 ± 17                                           | 91 ± 60                                          | 174 ± 62                                             |
| √ (K)                |                      | Stove                    | A1   | 84                  | 99 ± 13                                           | 119 ± 14                                         | 320 ± 45                                             |
| √ (K)                | SH                   | Stove                    | D1   | 631                 | 118 ± 33                                          | 139 ± 42                                         | 397 ± 60                                             |
| √ (K)                | SH                   | Stove                    | D1   | 750                 | 72 ± 24                                           | 92 ± 30                                          | 330 ± 46                                             |
| √ (NG)               | SH                   | Stove                    | H1   | 64                  | 139 ± 27                                          | 288 ± 114                                        | 343 ± 72                                             |
| √ (NG)               | SH                   | Stove                    | H1   | 369                 | 75 ± 18                                           | 226 ± 76                                         | 198 ± 47                                             |
| √ (NG)               | SH                   | Stove                    | H1   | 520                 | 61 ± 26                                           | 168 ± 60                                         | 154 ± 39                                             |
| √ (NG)               | SH+TS                | Stove                    | GFA3 | 123                 | 92 ± 33                                           | 189 ± 46                                         | 123 ± 34                                             |
| √ (NG)               | SH+TS                | Stove                    | GFA3 | 221                 | 132 ± 31                                          | 291 ± 61                                         | 242 ± 77                                             |
| --                   |                      | Stove / Soup             | A1   | 38                  | 40 ± 11                                           | 76 ± 17                                          | 144 ± 40                                             |
| --                   |                      | Stove / Chai Latte       | A1   | 34                  | 41 ± 13                                           | 49 ± 13                                          | 160 ± 44                                             |
| √ (C)                |                      | Stove / intense cooking  | GFA2 | 174                 | 76 ± 41                                           | 191 ± 75                                         | 116 ± 29                                             |
| √ (C)                |                      | Stove / intense cooking  | GFA2 | 82                  | 85 ± 32                                           | 181 ± 56                                         | 207 ± 78                                             |
| √ (C)                |                      | Stove / intense cooking  | GFA2 | 348                 | 88 ± 31                                           | 201 ± 32                                         | 183 ± 91                                             |
| √ (C)                |                      | Stove / Tea              | GFA2 | 43                  | 31 ± 10                                           | 52 ± 11                                          | 117 ± 43                                             |
| √ (C)                |                      | Stove / Tea + Coffee     | GFA2 | 73                  | 16 ± 4                                            | 42 ± 10                                          | 46 ± 13                                              |
| √ (AC)               |                      | Stove / intense          | A2   | 194                 | 62 ± 19                                           | 112 ± 40                                         | 74 ± 28                                              |
| √ (AC)               |                      |                          | A2   | 189                 | 10 ± 3                                            | 61 ± 28                                          | 12 ± 4                                               |
| √ (C)                |                      | Microwave                | GFA2 | 19                  | 17 ± 5                                            | 44 ± 11                                          | 47 ± 17                                              |
| --                   |                      | Brewing Coffee           | A1   | 38                  | 7 ± 2                                             | 31 ± 21                                          | 11 ± 5                                               |
| --                   |                      | Brewing Coffee + Toaster | A1   | 19                  | 14 ± 10                                           | 18 ± 11                                          | 42 ± 29                                              |
| --                   |                      | Toaster                  | A1   | 17                  | 15 ± 6                                            | 23 ± 7                                           | 44 ± 21                                              |

<sup>(1)</sup> Heating type: natural gas heater (NG), kerosene heater (K), central heating system (C), air conditioning split unit (AC), and none (--). <sup>(2)</sup> Smoking type: shisha (SH) and tobacco smoking (TS). <sup>(3)</sup> Cooking was reported on either a stove (natural gas) or using non-combustion appliances (e.g. water jug heater, microwave, etc.); the cooking intensity was indicated too.

**Table S6.** Overall mean background particle number concentrations ( $\Delta N$ , cm<sup>-3</sup>) in all homes.

| $\Delta Dp$ [ $\mu\text{m}$ ] | Mean  | std   | min    | 5 %   | 25 %  | median | 75 %  | 95 %   | max    |
|-------------------------------|-------|-------|--------|-------|-------|--------|-------|--------|--------|
| 0.01 – 0.025                  | 3 200 | 1 600 | 0      | 500   | 2 400 | 3 100  | 4 100 | 5 900  | 6 900  |
| 0.025 – 0.3                   | 6 600 | 3 300 | 3 100  | 3 200 | 4 300 | 5 600  | 8 800 | 14 800 | 16 500 |
| 0.3 – 0.5                     | 56    | 44    | 13     | 14    | 25    | 40     | 81    | 154    | 201    |
| 0.5 – 1                       | 6.4   | 5.5   | 1.4    | 1.5   | 2.4   | 4.1    | 8.6   | 20.4   | 21.8   |
| 1 – 2.5                       | 1.5   | 2.7   | 0.2    | 0.2   | 0.4   | 0.5    | 0.9   | 10.2   | 11.0   |
| 2.5 – 5                       | 0.2   | 0.5   | 0.01   | 0.01  | 0.04  | 0.1    | 0.1   | 1.7    | 1.9    |
| 5 – 10                        | 0.0   | 0.1   | 0.0001 | 0.002 | 0.005 | 0.010  | 0.027 | 0.30   | 0.33   |

**Table S7.** Overall mean particle number concentrations ( $\Delta N$ , cm<sup>-3</sup>) for TYPE I indoor activities.

| $\Delta Dp$ [ $\mu\text{m}$ ] | Mean   | std    | min   | 5 %   | 25 %  | median | 75 %   | 95 %   | max    |
|-------------------------------|--------|--------|-------|-------|-------|--------|--------|--------|--------|
| 0.01 – 0.025                  | 4 500  | 4 800  | 500   | 800   | 1 500 | 3 100  | 6 400  | 9 600  | 36 700 |
| 0.025 – 0.3                   | 11 900 | 12 300 | 4 400 | 5 000 | 6 300 | 8 900  | 10 200 | 42 600 | 75 600 |
| 0.3 – 0.5                     | 31     | 9      | 18    | 19    | 25    | 27     | 39     | 46     | 51     |
| 0.5 – 1                       | 5.3    | 1.8    | 3.1   | 3.3   | 4.0   | 4.3    | 7.2    | 8.3    | 9.5    |
| 1 – 2.5                       | 2.1    | 1.1    | 0.4   | 0.6   | 1.4   | 1.7    | 3.2    | 3.8    | 4.9    |
| 2.5 – 5                       | 0.5    | 0.3    | 0.1   | 0.1   | 0.3   | 0.5    | 0.8    | 1.1    | 1.8    |
| 5 – 10                        | 0.2    | 0.1    | 0.01  | 0.02  | 0.1   | 0.1    | 0.2    | 0.4    | 0.6    |

**Table S8.** Overall mean particle number concentrations ( $\Delta N$ , cm<sup>-3</sup>) for TYPE II indoor activities.

| $\Delta Dp$ [ $\mu\text{m}$ ] | Mean    | std    | min    | 5 %    | 25 %   | median | 75 %    | 95 %    | max     |
|-------------------------------|---------|--------|--------|--------|--------|--------|---------|---------|---------|
| 0.01 – 0.025                  | 29 000  | 21 700 | 400    | 7 700  | 15 200 | 24 200 | 36 000  | 67 200  | 159 300 |
| 0.025 – 0.3                   | 115 100 | 75 600 | 11 600 | 32 400 | 56 300 | 87 700 | 156 300 | 255 000 | 304 100 |
| 0.3 – 0.5                     | 300     | 100    | 38     | 100    | 200    | 200    | 300     | 500     | 600     |
| 0.5 – 1                       | 53      | 32     | 9      | 23     | 31     | 45     | 58      | 126     | 156     |
| 1 – 2.5                       | 10.2    | 4.4    | 4.6    | 5.6    | 7.5    | 9.2    | 11.3    | 18.3    | 30.8    |
| 2.5 – 5                       | 1.5     | 0.6    | 0.5    | 0.5    | 1.0    | 1.5    | 1.8     | 2.5     | 3.5     |
| 5 – 10                        | 0.3     | 0.1    | 0.08   | 0.11   | 0.2    | 0.3    | 0.4     | 0.5     | 0.7     |

**Table S9.** Overall mean particle number concentrations ( $\Delta N$ , cm<sup>-3</sup>) for TYPE III indoor activities.

| $\Delta Dp$ [ $\mu\text{m}$ ] | Mean    | std     | min   | 5 %    | 25 %    | median  | 75 %    | 95 %    | max     |
|-------------------------------|---------|---------|-------|--------|---------|---------|---------|---------|---------|
| 0.01 – 0.025                  | 130 400 | 114 200 | 100   | 14 900 | 49 400  | 107 600 | 169 700 | 348 500 | 795 400 |
| 0.025 – 0.3                   | 158 300 | 75 100  | 1 600 | 17 700 | 102 100 | 173 700 | 220 300 | 257 600 | 294 900 |
| 0.3 – 0.5                     | 400     | 400     | 0     | 100    | 200     | 300     | 500     | 1 200   | 2 200   |
| 0.5 – 1                       | 52      | 46      | 4     | 7      | 23      | 34      | 66      | 145     | 351     |
| 1 – 2.5                       | 16.0    | 18.4    | 0.5   | 1.2    | 4.2     | 8.4     | 19.5    | 58.8    | 109.4   |
| 2.5 – 5                       | 4.8     | 6.0     | 0.1   | 0.2    | 1.1     | 2.4     | 5.8     | 19.4    | 28.5    |
| 5 – 10                        | 1.1     | 1.3     | 0.01  | 0.04   | 0.3     | 0.6     | 1.2     | 4.4     | 6.7     |

**Table S10.** Overall mean particle number concentrations ( $\Delta N$ , cm<sup>-3</sup>) for TYPE IV indoor activities.

| $\Delta Dp$ [ $\mu\text{m}$ ] | Mean    | std     | min   | 5 %    | 25 %   | median  | 75 %    | 95 %    | max     |
|-------------------------------|---------|---------|-------|--------|--------|---------|---------|---------|---------|
| 0.01 – 0.025                  | 212 500 | 150 700 | 800   | 39 500 | 90 000 | 182 200 | 306 300 | 449 900 | 901 000 |
| 0.025 – 0.3                   | 157 000 | 79 800  | 8 200 | 48 000 | 94 200 | 135 600 | 223 100 | 300 600 | 334 900 |
| 0.3 – 0.5                     | 1 600   | 1 500   | 100   | 100    | 400    | 800     | 3 000   | 4 400   | 5 200   |
| 0.5 – 1                       | 179     | 219     | 12    | 16     | 38     | 72      | 250     | 669     | 1 126   |
| 1 – 2.5                       | 15.7    | 15.0    | 1.7   | 2.3    | 5.3    | 14.0    | 20.3    | 40.8    | 349.4   |
| 2.5 – 5                       | 3.9     | 3.2     | 0.3   | 0.5    | 1.1    | 3.8     | 5.6     | 9.8     | 27.8    |
| 5 – 10                        | 1.1     | 0.9     | 0.05  | 0.11   | 0.3    | 1.0     | 1.5     | 2.7     | 7.9     |

## S6. Dose Rate Calculations Based on the Median Particle Number Size Distributions

**Table S11.** Median regional dose rates for adult exposure during indoor background conditions. Note that yardwork is assumed to be equivalent to housework and running is equivalent to indoor exercising.

|                                              |                  | Males |      |       |       | Females |      |       |       |
|----------------------------------------------|------------------|-------|------|-------|-------|---------|------|-------|-------|
|                                              |                  | Head  | TB   | Alv   | Total | Head    | TB   | Alv   | Total |
| PN <sub>1</sub><br>[×10 <sup>6</sup> #/hour] | Yardwork         | 700   | 1600 | 6700  | 8900  | 400     | 1100 | 4000  | 5500  |
|                                              | Running 8.0 km/h | 1400  | 3200 | 13300 | 17800 | 1200    | 3000 | 11300 | 15500 |
|                                              | Walking 4.0 km/h | 500   | 1300 | 5300  | 7100  | 500     | 1200 | 4500  | 6100  |
|                                              | Standing         | 500   | 800  | 3400  | 3200  | 400     | 700  | 1300  | 2400  |
|                                              | Sitting          | 400   | 600  | 2800  | 2600  | 300     | 600  | 1100  | 2100  |
| PM <sub>2.5</sub><br>[µg/hour]               | Yardwork         | 0.3   | 0.6  | 2.7   | 3.5   | 0.2     | 0.4  | 1.6   | 2.1   |
|                                              | Running 8.0 km/h | 0.5   | 1.2  | 5.3   | 7.0   | 0.5     | 1.0  | 4.5   | 6.0   |
|                                              | Walking 4.0 km/h | 0.2   | 0.5  | 2.1   | 2.8   | 0.2     | 0.4  | 1.8   | 2.4   |
|                                              | Standing         | 0.5   | 0.2  | 1.3   | 1.7   | 0.4     | 0.2  | 0.6   | 1.2   |
|                                              | Sitting          | 0.4   | 0.2  | 1.1   | 1.4   | 0.3     | 0.2  | 0.5   | 1.0   |
| PM <sub>10</sub><br>[µg/hour]                | Yardwork         | 3.1   | 3.1  | 4.4   | 10.6  | 2.0     | 1.9  | 2.7   | 6.6   |
|                                              | Running 8.0 km/h | 6.2   | 6.2  | 8.8   | 21.3  | 5.6     | 5.3  | 7.6   | 18.5  |
|                                              | Walking 4.0 km/h | 2.5   | 2.5  | 3.5   | 8.4   | 2.2     | 2.1  | 3.0   | 7.3   |
|                                              | Standing         | 2.8   | 0.5  | 4.0   | 4.6   | 2.0     | 0.4  | 0.9   | 3.2   |
|                                              | Sitting          | 2.3   | 0.4  | 3.3   | 3.8   | 1.7     | 0.3  | 0.8   | 2.8   |

**Table S12.** Median regional dose rate for adults exposure during TYPE I indoor activities. Note that yardwork is assumed to be equivalent to housework and running is equivalent to indoor exercising.

|                                              |                  | Males |      |       |       | Females |      |       |       |
|----------------------------------------------|------------------|-------|------|-------|-------|---------|------|-------|-------|
|                                              |                  | Head  | TB   | Alv   | Total | Head    | TB   | Alv   | Total |
| PN <sub>1</sub><br>[×10 <sup>6</sup> #/hour] | Yardwork         | 800   | 1900 | 8400  | 11200 | 500     | 1300 | 5000  | 6900  |
|                                              | Running 8.0 km/h | 1700  | 3900 | 16700 | 22300 | 1500    | 3700 | 14100 | 19200 |
|                                              | Walking 4.0 km/h | 700   | 1500 | 6600  | 8800  | 600     | 1400 | 5600  | 7600  |
|                                              | Standing         | 600   | 900  | 4200  | 4100  | 500     | 800  | 1700  | 3000  |
|                                              | Sitting          | 500   | 800  | 3400  | 3300  | 400     | 700  | 1400  | 2600  |
| PM <sub>2.5</sub><br>[μg/hour]               | Yardwork         | 0.5   | 1.1  | 5.0   | 6.7   | 0.3     | 0.7  | 3.1   | 4.1   |
|                                              | Running 8.0 km/h | 1.0   | 2.3  | 10.1  | 13.4  | 0.9     | 2.0  | 8.6   | 11.6  |
|                                              | Walking 4.0 km/h | 0.4   | 0.9  | 4.0   | 5.3   | 0.4     | 0.8  | 3.4   | 4.6   |
|                                              | Standing         | 1.3   | 0.4  | 2.5   | 3.5   | 0.9     | 0.3  | 1.1   | 2.4   |
|                                              | Sitting          | 1.1   | 0.3  | 2.1   | 2.8   | 0.8     | 0.3  | 1.0   | 2.1   |
| PM <sub>10</sub><br>[μg/hour]                | Yardwork         | 37.0  | 30.9 | 20.7  | 88.5  | 23.7    | 18.3 | 12.9  | 54.9  |
|                                              | Running 8.0 km/h | 73.9  | 61.8 | 41.3  | 177.0 | 66.5    | 51.5 | 36.2  | 154.1 |
|                                              | Walking 4.0 km/h | 29.3  | 24.5 | 16.4  | 70.2  | 26.3    | 20.4 | 14.3  | 61.0  |
|                                              | Standing         | 27.2  | 3.0  | 33.6  | 36.1  | 19.4    | 2.3  | 3.9   | 25.6  |
|                                              | Sitting          | 22.2  | 2.5  | 27.5  | 29.5  | 17.0    | 2.0  | 3.5   | 22.4  |

**Table S13.** Median regional dose rate for adults exposure during TYPE II indoor activities. Note that yardwork is assumed to be equivalent to housework and running is equivalent to indoor exercising.

|                                              |                  | Males |       |        |        | Females |       |        |        |
|----------------------------------------------|------------------|-------|-------|--------|--------|---------|-------|--------|--------|
|                                              |                  | Head  | TB    | Alv    | Total  | Head    | TB    | Alv    | Total  |
| PN <sub>1</sub><br>[×10 <sup>6</sup> #/hour] | Yardwork         | 7600  | 17300 | 75500  | 100400 | 4600    | 11600 | 45300  | 61500  |
|                                              | Running 8.0 km/h | 15200 | 34700 | 150900 | 200800 | 13000   | 32500 | 127200 | 172600 |
|                                              | Walking 4.0 km/h | 6000  | 13700 | 59900  | 79600  | 5100    | 12900 | 50400  | 68400  |
|                                              | Standing         | 5100  | 8300  | 37600  | 36500  | 4100    | 7500  | 15000  | 26600  |
|                                              | Sitting          | 4200  | 6800  | 30800  | 29900  | 3600    | 6600  | 13100  | 23300  |
| PM <sub>2.5</sub><br>[μg/hour]               | Yardwork         | 3.9   | 8.6   | 39.1   | 51.6   | 2.4     | 5.5   | 23.7   | 31.6   |
|                                              | Running 8.0 km/h | 7.8   | 17.3  | 78.2   | 103.2  | 6.7     | 15.5  | 66.4   | 88.6   |
|                                              | Walking 4.0 km/h | 3.1   | 6.8   | 31.0   | 40.9   | 2.7     | 6.1   | 26.3   | 35.1   |
|                                              | Standing         | 8.1   | 3.3   | 19.3   | 24.9   | 5.7     | 2.9   | 8.6    | 17.2   |
|                                              | Sitting          | 6.6   | 2.7   | 15.8   | 20.4   | 5.0     | 2.6   | 7.5    | 15.1   |
| PM <sub>10</sub><br>[μg/hour]                | Yardwork         | 94.1  | 85.4  | 85.2   | 264.7  | 60.3    | 51.0  | 52.6   | 163.9  |
|                                              | Running 8.0 km/h | 188.2 | 170.7 | 170.5  | 529.4  | 169.1   | 143.2 | 147.6  | 459.9  |
|                                              | Walking 4.0 km/h | 74.6  | 67.7  | 67.6   | 209.9  | 67.0    | 56.7  | 58.4   | 182.1  |
|                                              | Standing         | 75.2  | 10.2  | 100.2  | 110.9  | 53.5    | 8.1   | 16.8   | 78.3   |
|                                              | Sitting          | 61.5  | 8.4   | 82.0   | 90.8   | 46.8    | 7.1   | 14.7   | 68.5   |

**Table S14.** Median regional dose rate for adults exposure during TYPE III indoor activities. Note that yardwork is assumed to be equivalent to housework and running is equivalent to indoor exercising.

|                                              |                  | Males |        |        |        | Females |       |        |        |
|----------------------------------------------|------------------|-------|--------|--------|--------|---------|-------|--------|--------|
|                                              |                  | Head  | TB     | Alv    | Total  | Head    | TB    | Alv    | Total  |
| PN <sub>1</sub><br>[×10 <sup>6</sup> #/hour] | Yardwork         | 22400 | 52200  | 219100 | 293600 | 13800   | 35400 | 133000 | 182100 |
|                                              | Running 8.0 km/h | 44700 | 104300 | 438100 | 587100 | 38800   | 99200 | 373000 | 511000 |
|                                              | Walking 4.0 km/h | 17700 | 41400  | 173700 | 232800 | 15400   | 39300 | 147700 | 202400 |
|                                              | Standing         | 15500 | 25400  | 111300 | 106200 | 12600   | 22700 | 42400  | 77700  |
|                                              | Sitting          | 12700 | 20800  | 91100  | 86900  | 11000   | 19900 | 37100  | 68000  |
| PM <sub>2.5</sub><br>[µg/hour]               | Yardwork         | 6.0   | 13.2   | 60.2   | 79.4   | 3.6     | 8.5   | 36.1   | 48.1   |
|                                              | Running 8.0 km/h | 12.0  | 26.3   | 120.5  | 158.7  | 10.2    | 23.7  | 101.2  | 135.0  |
|                                              | Walking 4.0 km/h | 4.7   | 10.4   | 47.8   | 63.0   | 4.0     | 9.4   | 40.1   | 53.5   |
|                                              | Standing         | 8.9   | 5.5    | 29.4   | 34.6   | 6.4     | 4.9   | 12.9   | 24.3   |
|                                              | Sitting          | 7.3   | 4.5    | 24.1   | 28.3   | 5.6     | 4.3   | 11.3   | 21.2   |
| PM <sub>10</sub><br>[µg/hour]                | Yardwork         | 172.0 | 151.6  | 138.5  | 462.1  | 110.1   | 90.5  | 85.2   | 285.8  |
|                                              | Running 8.0 km/h | 343.9 | 303.2  | 277.1  | 924.2  | 308.9   | 254.0 | 239.0  | 801.9  |
|                                              | Walking 4.0 km/h | 136.4 | 120.2  | 109.9  | 366.5  | 122.3   | 100.6 | 94.7   | 317.6  |
|                                              | Standing         | 129.6 | 17.8   | 174.7  | 188.2  | 92.5    | 14.1  | 27.0   | 133.6  |
|                                              | Sitting          | 106.0 | 14.6   | 142.9  | 154.0  | 80.9    | 12.4  | 23.6   | 116.9  |

**Table S15.** Median regional dose rate for adults exposure during TYPE IV indoor activities. Note that yardwork is assumed to be equivalent to housework and running is equivalent to indoor exercising.

|                                              |                  | Males |        |        |        | Females |        |        |        |
|----------------------------------------------|------------------|-------|--------|--------|--------|---------|--------|--------|--------|
|                                              |                  | Head  | TB     | Alv    | Total  | Head    | TB     | Alv    | Total  |
| PN <sub>1</sub><br>[×10 <sup>6</sup> #/hour] | Yardwork         | 29500 | 70000  | 285500 | 385000 | 18500   | 48000  | 174900 | 241400 |
|                                              | Running 8.0 km/h | 59000 | 140100 | 571000 | 770100 | 51900   | 134700 | 490600 | 677200 |
|                                              | Walking 4.0 km/h | 23400 | 55500  | 226400 | 305400 | 20600   | 53300  | 194300 | 268200 |
|                                              | Standing         | 21000 | 34500  | 147500 | 138500 | 17000   | 30700  | 53900  | 101600 |
|                                              | Sitting          | 17200 | 28200  | 120700 | 113300 | 14900   | 26800  | 47200  | 88900  |
| PM <sub>2.5</sub><br>[µg/hour]               | Yardwork         | 6.3   | 13.9   | 63.2   | 83.4   | 3.9     | 8.9    | 38.3   | 51.1   |
|                                              | Running 8.0 km/h | 12.6  | 27.8   | 126.5  | 166.8  | 10.9    | 25.0   | 107.4  | 143.3  |
|                                              | Walking 4.0 km/h | 5.0   | 11.0   | 50.2   | 66.2   | 4.3     | 9.9    | 42.5   | 56.7   |
|                                              | Standing         | 12.9  | 5.5    | 31.2   | 40.3   | 9.1     | 4.8    | 13.9   | 27.8   |
|                                              | Sitting          | 10.5  | 4.5    | 25.5   | 33.0   | 7.9     | 4.2    | 12.2   | 24.3   |
| PM <sub>10</sub><br>[µg/hour]                | Yardwork         | 258.1 | 225.0  | 184.7  | 667.8  | 165.4   | 134.1  | 114.5  | 414.0  |
|                                              | Running 8.0 km/h | 516.2 | 450.0  | 369.3  | 1335.6 | 464.1   | 376.2  | 321.2  | 1161.5 |
|                                              | Walking 4.0 km/h | 204.7 | 178.5  | 146.5  | 529.6  | 183.8   | 149.0  | 127.2  | 460.0  |
|                                              | Standing         | 197.0 | 24.3   | 253.0  | 275.3  | 140.4   | 18.9   | 35.6   | 194.9  |
|                                              | Sitting          | 161.2 | 19.9   | 207.0  | 225.2  | 122.8   | 16.5   | 31.2   | 170.5  |

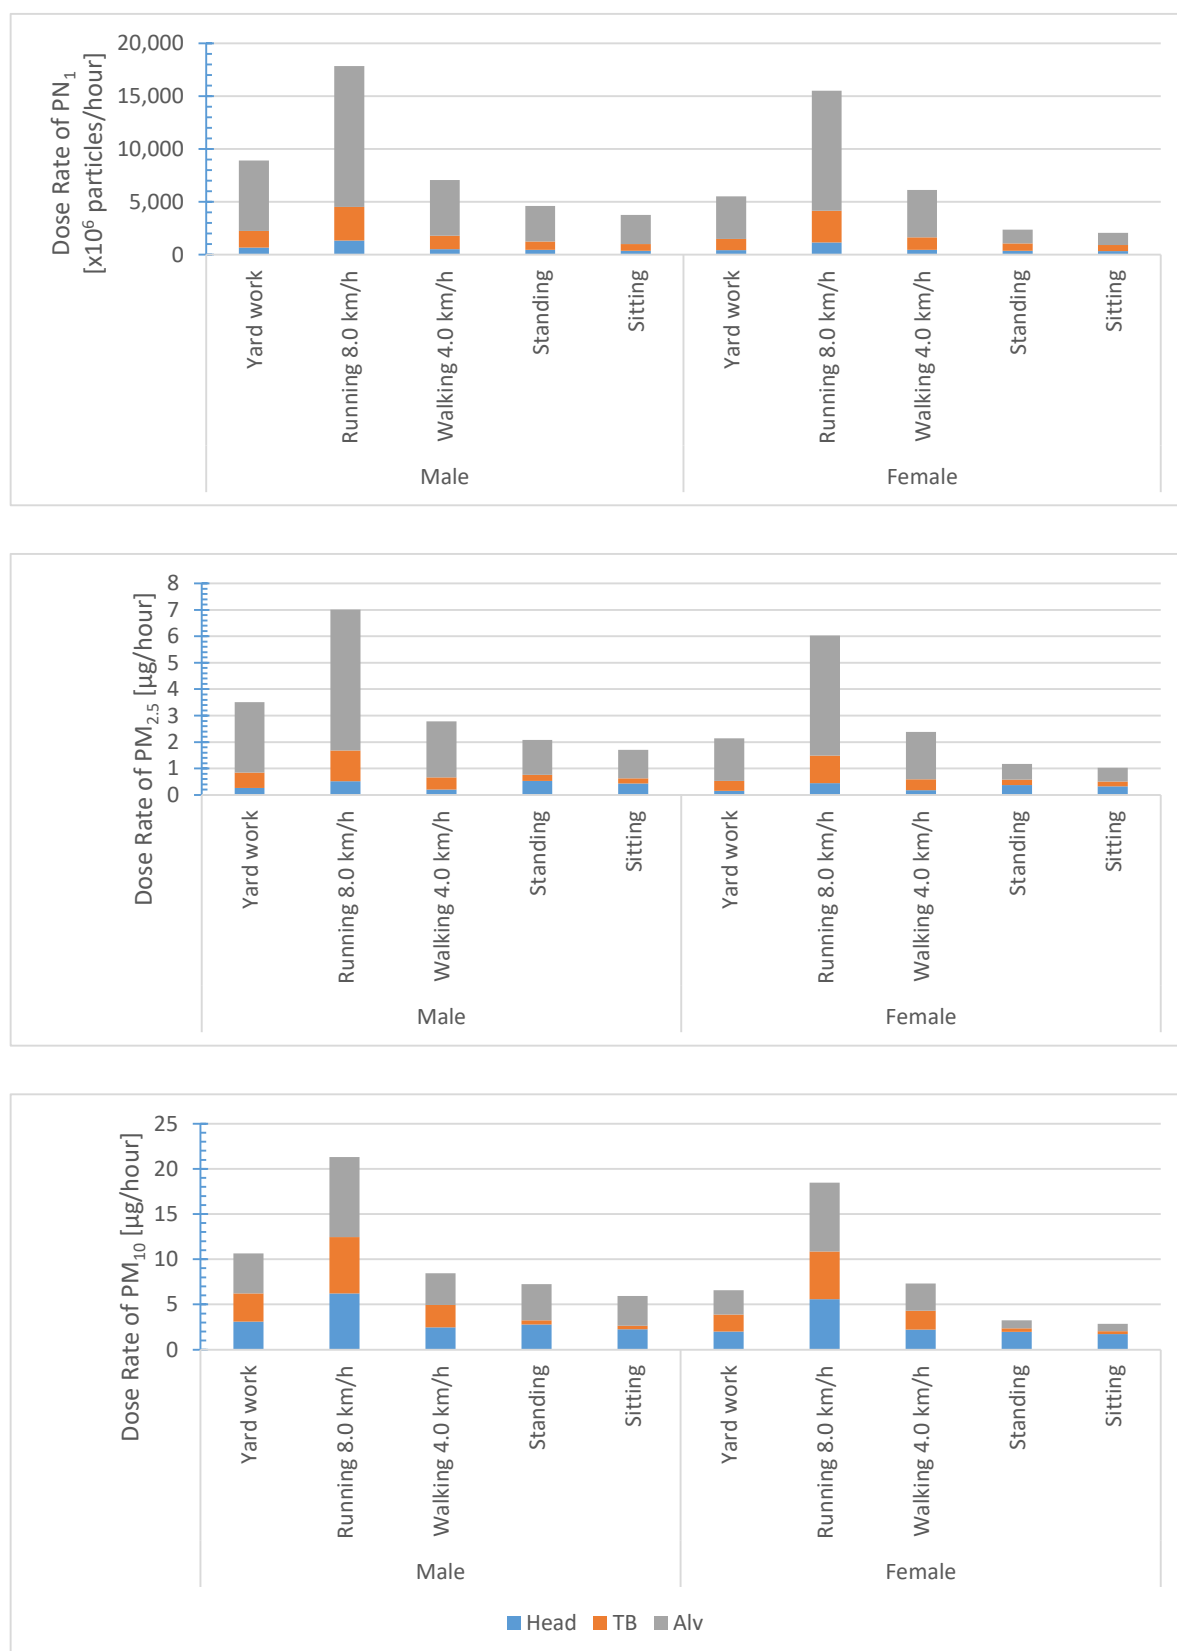

**Figure S4.** The indoor background conditions; regional inhaled deposited dose rates calculated for different activities (exposure based on median concentrations) and adults: (**upper**) number of submicron particles and (**middle, lower**) particulate matter PM<sub>2.5</sub> and PM<sub>10</sub>. The color legend is: (blue) head airways, (red) tracheobronchial, and (gray) alveolar. Note that “yard work” is equivalent to “house work” activities and “running” is equivalent to “exercising (e.g. treadmill)”.

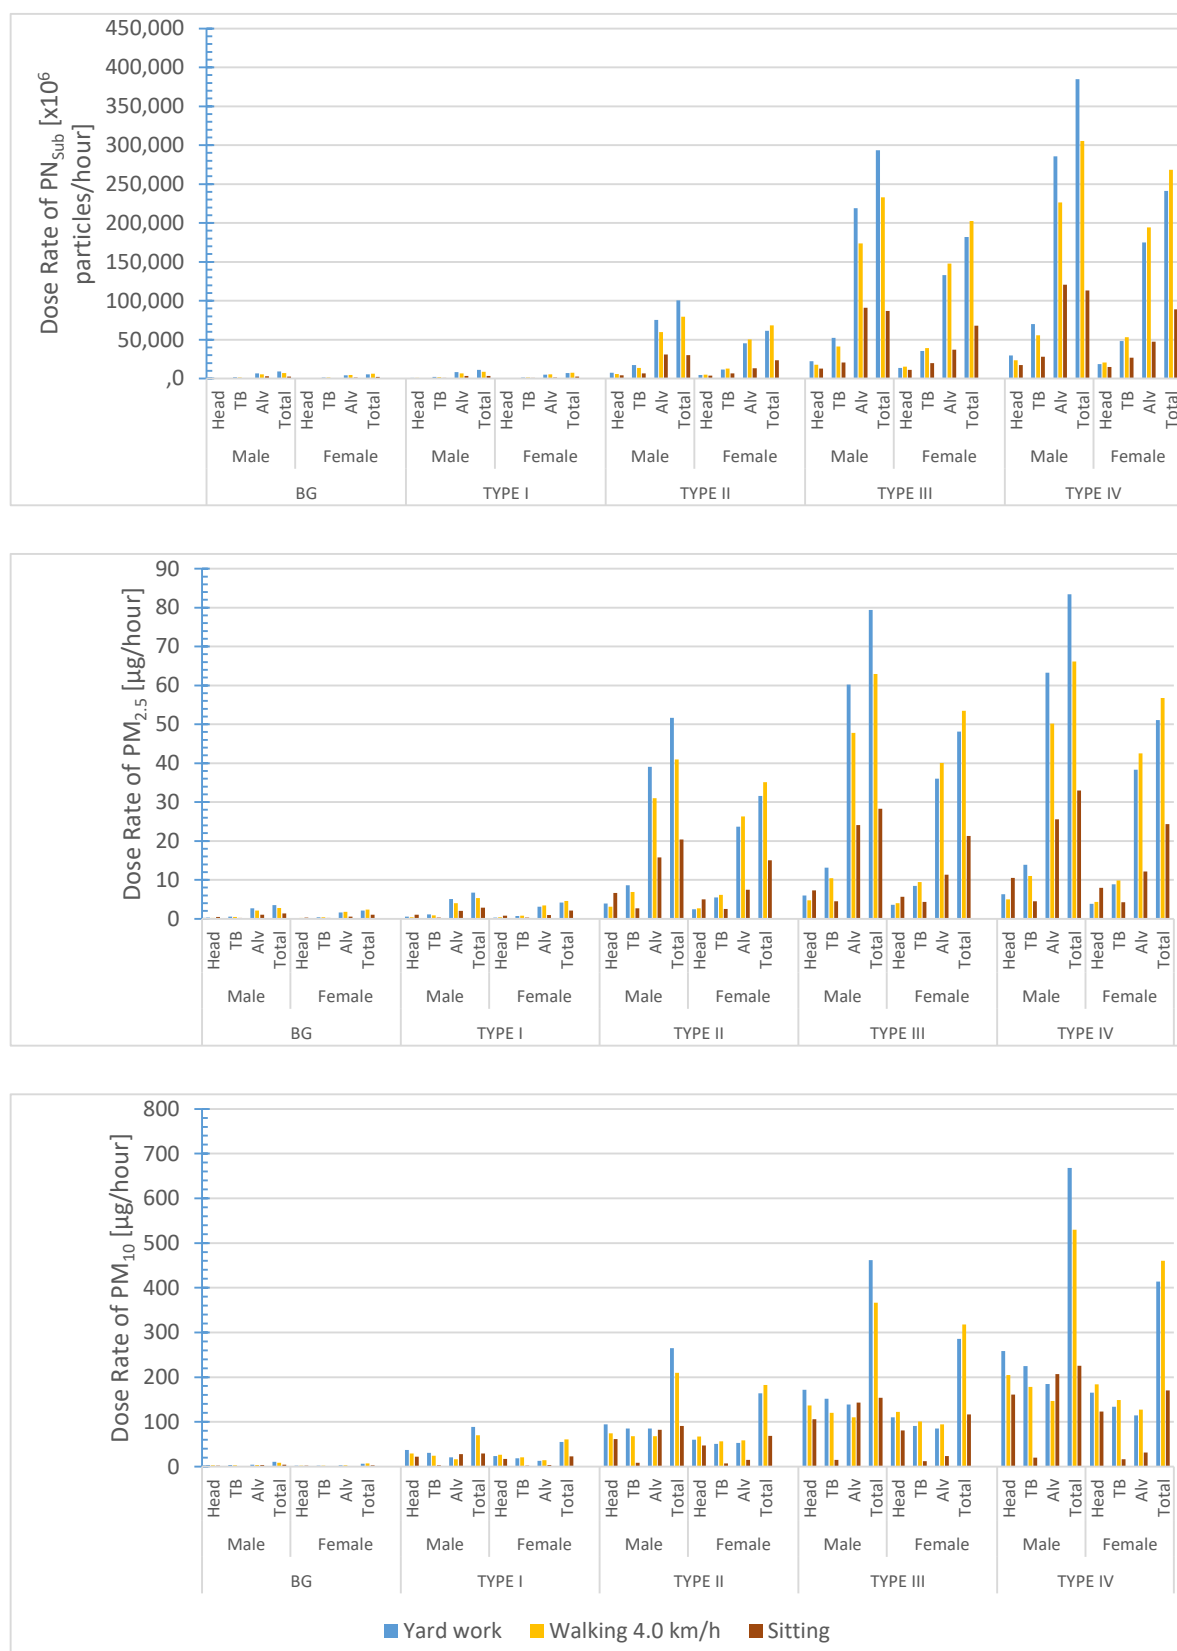

**Figure S5.** The categorized indoor activities and background conditions; regional inhaled deposited dose rates calculated (exposure based on median concentrations) for different activities and adults: (**upper**) number of submicron particles and (**middle, lower**) particulate matter  $PM_{2.5}$  and  $PM_{10}$ . The color legend is: (blue) yard work equivalent activities, (yellow) walking activities, and (red) sitting and resting.

**References**

All citations appeared in this supplementary material are found in the references list in the main text of the manuscript.
